# Supplementary material for: Implementation of a New Food Picture Database in the Context of fMRI and Visual Cognitive Food-Choice Task in Healthy Volunteers
Source: Front Psychol. 2019 Nov 26;10:2620. doi: 10.3389/fpsyg.2019.02620 (PMC6902029; doi:10.3389/fpsyg.2019.02620)
Supplement: Supplementary file 1 [file Table_1.xlsx]

## Sheet: Food Picture Database
Supplementary Table S1
The complete food picture database is freely available for research purposes. To obtain the whole database, please contact the corresponding author at the following address: david.val-laillet@inra.fr
The metadata associated with the food pictures are provided in the worksheet entitled "Metadata". The whole database currently contains 170 food pictures, including 44 starters, 63 mains courses, 6 cheeses, and 57 desserts. Among the different parameters provided in the metadata are the type of dishes, their names in French and English, net weight, and total calories, as well as image characteris…
In any research or communication using or refering to this database, please cite the original paper as follows: Gautier Y, Meurice P, Coquery N, Constant A, Bannier E, Serrand Y, Ferré J-C, Moirand R and Val-Laillet D (2019) Implementation of a New Food Picture Database in the Context of fMRI and Visual Cognitive Food-Choice Task in Healthy Volunteers. Front. Psychol. 10:2620. doi: 10.3389/fpsyg.…

## Sheet: Metadata
dish type	dish name (in French)	dish name (in English)	net weight	total calories	image name	is_food	size	size	red	green	blue	object_size	intensity	intensity_norm	sd	edges	complexity	complexity_norm	powspec	meanpow	medianpow
main dish	côte de porc + riz	pork chop + rice		455.02	'DSC_2503.jpg'	0	900	1200	0.402698	0.329563	0.26774	0.680356	103.582	91.1702	38.6041	900x1200 single	0.204847	0.301088	601x1 single	16.9387	16.1761
dessert	creme caramel	caramel cream	143	194.48	'DSC_2505.jpg'	0	900	1200	0.4638	0.305299	0.230902	0.207971	128.394	122.276	57.6136	900x1200 single	0.0342778	0.16482	601x1 single	14.8708	14.0386
dessert	raisin	grape	140	98	'DSC_2506.jpg'	0	900	1200	0.360009	0.349198	0.290794	0.20991	123.44	98.7501	33.4256	900x1200 single	0.0469769	0.223795	601x1 single	15.3191	14.6045
main dish	cabillaud + fenouil	cod + fennel		78.885	'DSC_2507.jpg'	0	900	1200	0.34242	0.335326	0.322254	0.612206	97.5286	76.9599	32.8717	900x1200 single	0.123093	0.201064	601x1 single	16.5342	15.7805
dessert	poire	pear	125	66.25	'DSC_2508.jpg'	0	900	1200	0.376393	0.344311	0.279296	0.185164	122.055	87.0936	34.5022	900x1200 single	0.0400185	0.216125	601x1 single	15.7928	15.1431
starter	jambon	ham	44	102.08	'DSC_2995.jpg'	0	900	1200	0.405345	0.327402	0.267253	0.255525	119.801	90.0869	36.3619	900x1200 single	0.0603565	0.236206	601x1 single	16.0353	15.3333
starter	lentilles	lentils	116	132.24	'DSC_2996.jpg'	0	900	1200	0.389153	0.318084	0.292763	0.222131	131.287	135.795	57.9742	900x1200 single	0.0871111	0.392162	601x1 single	17.042	16.1772
cheese	camembert	Camembert	48	129.6	'DSC_2997.jpg'	0	900	1200	0.337043	0.35097	0.311987	0.211483	120.395	84.5816	38.1608	900x1200 single	0.0288565	0.136448	601x1 single	14.5681	13.8563
dessert	mandarine	mandarin	157	76.145	'DSC_2999.jpg'	0	900	1200	0.472732	0.333322	0.193947	0.196695	125.305	106.133	24.8027	900x1200 single	0.026162	0.133008	601x1 single	14.4704	13.7604
dessert	pomme Gala	Gala apple	175	93.1	'DSC_3000.jpg'	0	900	1200	0.434888	0.285787	0.279325	0.236864	124.379	106.268	37.5118	900x1200 single	0.0454306	0.1918	601x1 single	15.3206	14.7028
main dish	poisson + chou	fish + cabbage	160	90.584	'DSC_3001.jpg'	0	900	1200	0.344847	0.33333	0.321823	0.557041	90.9958	59.9796	21.0405	900x1200 single	0.0744398	0.133634	601x1 single	15.9465	15.1295
main dish	porc + chou	pork + cabbage	189	293.924	'DSC_3003.jpg'	0	900	1200	0.361193	0.334161	0.304646	0.544314	99.8247	74.5627	29.8942	900x1200 single	0.0881204	0.161893	601x1 single	15.9358	15.2502
main dish	poisson + riz	fish + rice	184	211.31	'DSC_3005.jpg'	0	900	1200	0.349453	0.332362	0.318185	0.578629	95.307	70.0427	24.5414	900x1200 single	0.104231	0.180135	601x1 single	16.4813	15.6856
main dish	porc + riz	pork + rice	214	414.65	'DSC_3008.jpg'	0	900	1200	0.363787	0.333709	0.302504	0.517061	102.965	77.7145	32.0277	900x1200 single	0.0998657	0.193141	601x1 single	16.4487	15.6848
dessert	galette des rois	Epiphany cake	88	401.28	'DSC_3009.jpg'	0	900	1200	0.376814	0.333249	0.289936	0.386372	108.361	73.995	27.6535	900x1200 single	0.0704954	0.182455	601x1 single	15.6097	14.974
starter	celeri rave + branche	celeri rave + branch	70	18.34	'DSC_3010.jpg'	0	900	1200	0.372019	0.348842	0.279139	0.19478	120.377	80.594	26.3	900x1200 single	0.062213	0.319402	601x1 single	15.3776	14.5826
dessert	tarte à la poire	pear tart	122	355.02	'DSC_3012.jpg'	0	900	1200	0.389157	0.335285	0.275558	0.220186	119.486	82.249	28.5596	900x1200 single	0.059588	0.270625	601x1 single	15.2773	14.5498
starter	œuf remoulade	remoulade egg	105	231.69	'DSC_3014.jpg'	0	900	1200	0.367392	0.341455	0.291153	0.16334	122.999	87.1401	33.8308	900x1200 single	0.0365787	0.223942	601x1 single	15.0787	14.3097
dessert	poire	Pear	144	76.32	'DSC_3015.jpg'	0	900	1200	0.370579	0.351299	0.278122	0.173199	124.145	96.1929	34.4636	900x1200 single	0.0509028	0.293898	601x1 single	16.3214	15.7708
dessert	pomme Golden	Golden apple	129	68.628	'DSC_3017.jpg'	0	900	1200	0.366422	0.351706	0.281872	0.188773	121.019	82.4249	24.1665	900x1200 single	0.022463	0.118994	601x1 single	14.1145	13.2723
main dish	andouillette + chou	andouillette + cabbage	217	410.717	'DSC_3019.jpg'	0	900	1200	0.39113	0.330524	0.278346	0.527259	113.414	98.5429	49.9062	900x1200 single	0.119009	0.225713	601x1 single	16.8428	16.1305
main dish	paleron + lentilles	chuck steak + lentils	214	286.08	'DSC_3020.jpg'	0	900	1200	0.379051	0.325665	0.295284	0.535997	121.909	114.906	62.5359	900x1200 single	0.128648	0.240016	601x1 single	17.3201	16.5729
main dish	andouillette + lentilles	andouillette + lentils	254	520.08	'DSC_3023.jpg'	0	900	1200	0.376945	0.32431	0.298746	0.545516	115.002	102.507	62.0534	900x1200 single	0.133185	0.244145	601x1 single	17.1367	16.3208
main dish	paleron + chou	chuck steak + cabbage	174	176.717	'DSC_3025.jpg'	0	900	1200	0.391228	0.330954	0.277818	0.571614	115.213	104.132	55.3171	900x1200 single	0.125014	0.218703	601x1 single	17.2875	16.5756
main dish	poulet + pommes de terre	chicken + potatoes	347	488.094	'DSC_3027.jpg'	0	900	1200	0.390351	0.333092	0.276558	0.503223	110.069	90.3934	42.4546	900x1200 single	0.0680093	0.135147	601x1 single	16.2972	15.4963
dessert	tarte à la myrtille	blueberry pie	138	383.64	'DSC_3029.jpg'	0	900	1200	0.350511	0.311843	0.337646	0.24112	126.894	117.118	67.3574	900x1200 single	0.0478704	0.198533	601x1 single	16.9702	16.3359
dessert	pomme Granny	Granny apple	189	100.548	'DSC_3031.jpg'	0	900	1200	0.352972	0.372029	0.274999	0.191303	119.94	77.4133	20.2124	900x1200 single	0.0235278	0.122987	601x1 single	14.4755	13.8609
starter	avocat crabe	avocado crab	130	206.7	'DSC_3032.jpg'	0	900	1200	0.365713	0.341788	0.292498	0.178473	122.254	86.6011	35.5649	900x1200 single	0.0511204	0.286432	601x1 single	15.8423	15.1257
main dish	poulet + ratatouille	chicken + ratatouille	319	461.853	'DSC_3033.jpg'	0	900	1200	0.405476	0.323395	0.271129	0.571856	110.56	96.0056	50.5387	900x1200 single	0.101935	0.178253	601x1 single	16.8568	16.0429
main dish	choucroute garnie	sauerkraut	344	378.4	'DSC_3034.jpg'	0	900	1200	0.395676	0.32549	0.278834	0.519853	111.128	93.6983	41.665	900x1200 single	0.0940972	0.181007	601x1 single	16.3736	15.5702
starter	jambon	ham	70	79.8	'DSC_3035.jpg'	0	900	1200	0.363374	0.329	0.307626	0.358978	113.973	85.3548	30.7255	900x1200 single	0.0541759	0.150917	601x1 single	14.8766	14.0495
cheese	cantal	cantal	53	371	'DSC_3037.jpg'	0	900	1200	0.350514	0.347296	0.30219	0.170967	119.961	71.2808	26.5705	900x1200 single	0.0249028	0.145659	601x1 single	14.4661	13.6628
dessert	mousse au chocolat	chocolate mousse	66	108.24	'DSC_3038.jpg'	0	900	1200	0.386814	0.317052	0.296134	0.144196	131.004	136.962	38.6857	900x1200 single	0.0220833	0.153148	601x1 single	15.3602	14.7079
starter	pamplemousse	grapefruit	137	49.183	'DSC_3040.jpg'	0	900	1200	0.423474	0.297872	0.278654	0.175094	123.099	90.5892	26.9677	900x1200 single	0.0431343	0.246349	601x1 single	15.2966	14.6272
dessert	tarte au chocolat	chocolate pie	138	401.58	'DSC_3042.jpg'	0	900	1200	0.397418	0.318456	0.284125	0.227135	122.494	96.9554	50.465	900x1200 single	0.0597546	0.26308	601x1 single	17.0864	16.3878
starter	fromage de tête	head cheese / brawn	113	189.84	'DSC_3043.jpg'	0	900	1200	0.354756	0.339078	0.306166	0.363569	111.437	78.9416	31.3919	900x1200 single	0.0669074	0.18403	601x1 single	15.8961	15.1846
starter	macédoine	macédoine	150	71.4	'DSC_3044.jpg'	0	900	1200	0.348732	0.340786	0.310482	0.171809	121.289	79.2958	31.7113	900x1200 single	0.0607315	0.353482	601x1 single	15.9198	15.1154
dessert	yaourt Panier de Yoplait mangue	mango yoghurt Panier de Yoplait	125	121.25	'DSC_3045.jpg'	0	900	1200	0.340173	0.337753	0.322074	0.0937611	123.713	62.9451	25.5648	900x1200 single	0.0199907	0.213209	601x1 single	16.3356	15.7186
main dish	cabillaud + broccoli	cod + broccoli	239	158.732	'DSC_3046.jpg'	0	900	1200	0.366053	0.343322	0.290625	0.524103	109.267	90.44	53.7785	900x1200 single	0.090338	0.172367	601x1 single	16.9171	16.2308
main dish	cabillaud + pates	cod + pasta	238	265.57	'DSC_3047.jpg'	0	900	1200	0.369324	0.335502	0.295174	0.627188	88.7975	64.3059	31.7121	900x1200 single	0.100745	0.16063	601x1 single	16.0489	15.2113
dessert	flan à la banane	banana flan	102	204	'DSC_3049.jpg'	0	900	1200	0.450764	0.324815	0.224421	0.218016	126.569	114.262	45.3789	900x1200 single	0.0693796	0.318232	601x1 single	16.0015	15.3477
main dish	dinde + broccoli	turkey + broccoli	205	167.252	'DSC_3050.jpg'	0	900	1200	0.382944	0.353474	0.263582	0.619362	108.645	95.5209	47.5234	900x1200 single	0.151431	0.244494	601x1 single	17.411	16.7269
main dish	dinde + pates	turkey + pasta	205	274.09	'DSC_3052.jpg'	0	900	1200	0.3838	0.340556	0.275643	0.621836	98.1224	78.7364	39.4716	900x1200 single	0.12475	0.200616	601x1 single	16.4862	15.7346
starter	salade de cervelas	cervelas salad	81	236.52	'DSC_3053.jpg'	0	900	1200	0.370006	0.334641	0.295353	0.197622	123.395	96.5777	36.779	900x1200 single	0.0589028	0.298057	601x1 single	15.954	15.1499
dessert	poire belle hélène	poire belle hélène	182	356.72	'DSC_3054.jpg'	0	900	1200	0.36244	0.326141	0.311419	0.190249	129.221	125.905	43.0507	900x1200 single	0.0402546	0.211589	601x1 single	16.1596	15.4883
starter	tomate + cœur de palmier	tomato + heart of palm	112	27.72	'DSC_3055.jpg'	0	900	1200	0.39808	0.346368	0.255552	0.253033	118.788	85.6893	36.2973	900x1200 single	0.0597407	0.236098	601x1 single	15.9574	15.2329
starter	galantine de volaille	poultry gallantine	100	239	'DSC_3056.jpg'	0	900	1200	0.351744	0.338215	0.310041	0.391429	113.738	88.4557	25.5775	900x1200 single	0.0616852	0.15759	601x1 single	15.4083	14.7414
starter	celeri	celery	92	33.672	'DSC_3057.jpg'	0	900	1200	0.37841	0.338386	0.283204	0.196037	124.663	102.774	38.8507	900x1200 single	0.0619028	0.315771	601x1 single	16.2266	15.4778
main dish	couscous	couscous	311	525.59	'DSC_3059.jpg'	0	900	1200	0.397808	0.32813	0.274062	0.57205	113.107	100.469	48.4385	900x1200 single	0.122745	0.214571	601x1 single	16.6611	15.924
dessert	brownie + creme anglaise	brownie + custard	111	522.81	'DSC_3060.jpg'	0	900	1200	0.375431	0.322938	0.301631	0.289142	120.621	97.5638	56.0557	900x1200 single	0.0413889	0.143144	601x1 single	16.3765	15.6688
main dish	quenelle couscous	quenelle + couscous	385	672.85	'DSC_3061.jpg'	0	900	1200	0.386693	0.333254	0.280053	0.567401	104.154	84.4484	37.5627	900x1200 single	0.10969	0.19332	601x1 single	16.4827	15.7318
starter	salage tomate poivron	tomato pepper salad	99	16.236	'DSC_3062.jpg'	0	900	1200	0.491135	0.320288	0.188577	0.205464	128.911	124.699	40.6993	900x1200 single	0.0680509	0.331206	601x1 single	16.3591	15.6358
starter	salage tomate poivron + fromage	tomato pepper salad + cheese	115	16.236	'DSC_3064.jpg'	0	900	1200	0.441116	0.333646	0.225239	0.20291	127.135	115.882	46.9341	900x1200 single	0.0587407	0.289491	601x1 single	16.2919	15.473
dessert	yaourt Perle de lait	yoghurt Perle de lait	125	152.5	'DSC_3065.jpg'	0	900	1200	0.292328	0.34323	0.364442	0.10951	123.92	74.4843	30.3752	900x1200 single	0.0201528	0.184027	601x1 single	16.4163	15.9545
main dish	cabillaud + purée	cod + mashed potatoes	332	274.564	'DSC_3066.jpg'	0	900	1200	0.356255	0.335363	0.308382	0.626373	88.2835	63.3999	22.2182	900x1200 single	0.0974028	0.155503	601x1 single	15.7445	14.9952
main dish	cabillaud + blettes	cod + chard	244	130.076	'DSC_3067.jpg'	0	900	1200	0.34947	0.335482	0.315048	0.614886	106.802	92.2723	52.9754	900x1200 single	0.107588	0.174972	601x1 single	16.8525	16.1126
dessert	banane	banana	124	116.064	'DSC_3068.jpg'	0	900	1200	0.376888	0.345291	0.277821	0.207387	117.827	71.3023	21.8956	900x1200 single	0.0249074	0.120101	601x1 single	14.0903	13.1735
starter	tomate	tomato	114	18.696	'DSC_3070.jpg'	0	900	1200	0.461917	0.305213	0.23287	0.18816	126.797	112.978	34.7	900x1200 single	0.0564074	0.299784	601x1 single	16.0682	15.3442
starter	carottes rapées	grated carrots	57	20.691	'DSC_3071.jpg'	0	900	1200	0.48416	0.33844	0.177399	0.236959	127.009	117.378	35.2489	900x1200 single	0.095713	0.403922	601x1 single	16.3071	15.6011
dessert	mandarines	tangerines	199	557.7	'DSC_3072.jpg'	0	900	1200	0.503025	0.320889	0.176086	0.22139	124.657	105.865	26.3699	900x1200 single	0.0291111	0.131493	601x1 single	15.048	14.4659
cheese	bûche chèvre	goat's cheese log	39	120.51	'DSC_3075.jpg'	0	900	1200	0.339024	0.347309	0.313667	0.194998	118.646	71.7718	24.7514	900x1200 single	0.027537	0.141217	601x1 single	13.7757	13.008
dessert	clafouti prune	clafouti plum	142	301.04	'DSC_3077.jpg'	0	900	1200	0.390171	0.33759	0.272239	0.246006	118.276	82.3438	29.4495	900x1200 single	0.0601343	0.244442	601x1 single	15.5608	14.8157
dessert	cookie	cookie	77	388.08	'DSC_3078.jpg'	0	900	1200	0.375048	0.332046	0.292906	0.259172	117.076	80.1337	40.6441	900x1200 single	0.0536759	0.207105	601x1 single	16.5726	15.7849
dessert	crème caramel	caramel cream	131	178.16	'DSC_3081.jpg'	0	900	1200	0.376472	0.341362	0.282166	0.205949	115.738	60.7483	23.2733	900x1200 single	0.0157361	0.0764078	601x1 single	13.1056	12.1386
starter	salade verte	green salad	25	3.875	'DSC_3083.jpg'	0	900	1200	0.360124	0.388452	0.251424	0.247592	120.026	89.7148	30.4825	900x1200 single	0.0737685	0.297944	601x1 single	15.9196	15.2326
starter	salade tomate surimi œuf	tomato salad surimi egg	90	37.738	'DSC_3085.jpg'	0	900	1200	0.386008	0.343074	0.270918	0.214792	124.017	102.146	37.3214	900x1200 single	0.0668241	0.311111	601x1 single	16.4065	15.6314
main dish	jamboneau + pommes de terre	knuckle of ham + potatoes	374	366.672	'DSC_3086.jpg'	0	900	1200	0.378521	0.328417	0.293062	0.688665	101.167	88.1328	47.4874	900x1200 single	0.0565278	0.0820832	601x1 single	16.3213	15.6037
main dish	sauté de veau + pommes de terre	sauteed veal + potatoes	359	315.162	'DSC_3087.jpg'	0	900	1200	0.394698	0.338752	0.26655	0.660882	105.107	92.3339	46.758	900x1200 single	0.0663333	0.100371	601x1 single	16.2714	15.5898
dessert	ananas coco	coconut pineapple	153	125.307	'DSC_3088.jpg'	0	900	1200	0.430508	0.34697	0.222521	0.191969	124.446	101.067	23.3443	900x1200 single	0.0383843	0.19995	601x1 single	15.9304	15.2867
dessert	yahourt 0%	yoghurt 0%	125	52.5	'DSC_3089.jpg'	0	900	1200	0.291786	0.329153	0.379061	0.114851	126.166	96.6203	40.3411	900x1200 single	0.0451157	0.39282	601x1 single	17.2498	16.8199
main dish	jamboneau poireaux	knuckle of ham + leek	254	255.648	'DSC_3090.jpg'	0	900	1200	0.368976	0.326885	0.304139	0.614453	106.071	91.0559	53.4257	900x1200 single	0.1075	0.174952	601x1 single	16.8864	16.0676
main dish	sauté de veau + poireaux	sauteed veal + leek	235	334.41	'DSC_3091.jpg'	0	900	1200	0.378469	0.337655	0.283876	0.613341	107.793	93.7929	48.9698	900x1200 single	0.103421	0.16862	601x1 single	17.0586	16.3421
starter	salade de pâtes	pasta salad	80	120.8	'DSC_3092.jpg'	0	900	1200	0.385167	0.369738	0.245095	0.25438	119.256	87.7649	32.1459	900x1200 single	0.0784259	0.308303	601x1 single	16.6225	15.9675
main dish	bœuf + haricot pates	beef + beans pasta	276	263.953	'DSC_3093.jpg'	0	900	1200	0.397676	0.340195	0.26213	0.68031	119.273	114.232	57.7345	900x1200 single	0.159889	0.235024	601x1 single	16.8684	16.1341
starter	salade de pâtes+ poulet	pasta + chicken	102	147.42	'DSC_3094.jpg'	0	900	1200	0.376365	0.36226	0.261375	0.227143	122.215	95.7246	33.6641	900x1200 single	0.0666065	0.293236	601x1 single	16.4278	15.7894
main dish	tartiflette	tartiflette	421	606.24	'DSC_3096.jpg'	0	900	1200	0.388616	0.335605	0.275779	0.363575	112.691	82.3926	35.9801	900x1200 single	0.0779491	0.214396	601x1 single	16.1806	15.4242
dessert	salade de fruits	fruit salad	155	129.425	'DSC_3097.jpg'	0	900	1200	0.397078	0.323628	0.279294	0.199307	126.867	114.283	36.4158	900x1200 single	0.0472407	0.237025	601x1 single	15.6677	14.8383
dessert	galette des rois	Epiphany cake	82	373.92	'DSC_3098.jpg'	0	900	1200	0.403232	0.336818	0.25995	0.271335	115.14	75.2331	22.7542	900x1200 single	0.0754398	0.278032	601x1 single	15.7529	15.0894
starter	avocat crevettes	shrimp avocado	107	164.716	'DSC_3100.jpg'	0	900	1200	0.353747	0.358484	0.287769	0.217731	123.357	99.4881	38.8674	900x1200 single	0.053412	0.245312	601x1 single	15.8618	15.1421
cheese	emmental	Emmental	42	154.14	'DSC_3101.jpg'	0	900	1200	0.340232	0.335527	0.324241	0.999839	128.094	128.094	40.1932	900x1200 single	0.0259815	0.0259857	601x1 single	14.9046	14.0588
dessert	mousse fraise	strawberry mousse	78	116.22	'DSC_3126.jpg'	0	900	1200	0.369115	0.327215	0.30367	0.167556	125.727	104.5	32.8557	900x1200 single	0.0432454	0.258094	601x1 single	15.7182	14.9884
starter	carotte lentilles	carrot lentils	99	82.0908	'DSC_3127.jpg'	0	900	1200	0.468213	0.324697	0.20709	0.21024	128.746	124.037	40.6385	900x1200 single	0.0834167	0.396769	601x1 single	16.4905	15.7501
starter	pâté de campagne	country-style pâté	100	333	'DSC_3128.jpg'	0	900	1200	0.351025	0.335139	0.313835	0.439569	108.209	80.4264	29.2575	900x1200 single	0.0664213	0.151105	601x1 single	15.9632	15.2993
main dish	steak fromage olive + riz	steak cheese olive + rice	175	343.41	'DSC_3129.jpg'	0	900	1200	0.358976	0.326827	0.314197	0.685706	96.8446	81.6477	43.7736	900x1200 single	0.109181	0.159224	601x1 single	16.5027	15.7695
dessert	salade de fruit	fruit salad	176	146.96	'DSC_3130.jpg'	0	900	1200	0.421908	0.329846	0.248246	0.21473	125.247	107.864	26.3107	900x1200 single	0.0448519	0.208876	601x1 single	15.5635	14.7867
main dish	steak fromage olive + chou	steak cheese olive + cabbage	195	264.902	'DSC_3131.jpg'	0	900	1200	0.356714	0.32881	0.314476	0.557006	99.5793	75.3854	43.7067	900x1200 single	0.0839167	0.150657	601x1 single	16.369	15.5411
main dish	émincé de porc + riz	sliced ​​pork rice	226	460.02	'DSC_3132.jpg'	0	900	1200	0.36618	0.332912	0.300908	0.647432	96.5844	78.3876	35.185	900x1200 single	0.118218	0.182594	601x1 single	16.3216	15.6206
main dish	émincé de porc + chou	sliced ​​pork cabbage	234	381.512	'DSC_3133.jpg'	0	900	1200	0.365754	0.333091	0.301154	0.635525	102.533	86.78	31.5793	900x1200 single	0.105134	0.165429	601x1 single	16.106	15.3965
dessert	ananas	pineapple	223	117.298	'DSC_3135.jpg'	0	900	1200	0.370228	0.350079	0.279693	0.45615	102.805	70.3824	32.9804	900x1200 single	0.0515972	0.113115	601x1 single	15.6259	14.8921
starter	salade tomate endive emmental	Emmental endive tomato salad	71	36.8561	'DSC_3136.jpg'	0	900	1200	0.398499	0.3371	0.2644	0.220808	121.5	91.5063	38.9309	900x1200 single	0.0611019	0.276719	601x1 single	16.1759	15.3596
dessert	creme caramel	caramel cream	149	202.64	'DSC_3138.jpg'	0	900	1200	0.465227	0.299954	0.234819	0.210478	129.477	127.515	58.7608	900x1200 single	0.0318009	0.151089	601x1 single	14.7706	13.939
dessert	yaourt aux fruits	yoghurt with fruits	125	120	'DSC_3139.jpg'	0	900	1200	0.37637	0.322109	0.301521	0.119444	125.768	94.5685	49.2937	900x1200 single	0.036287	0.303801	601x1 single	16.4715	15.9215
main dish	poulet + frites	chicken + French fries	276	582.66	'DSC_3140.jpg'	0	900	1200	0.397516	0.335304	0.26718	0.651399	100.252	84.3328	38.0426	900x1200 single	0.121269	0.186166	601x1 single	16.6988	15.8956
main dish	poisson + frites	fish + French fries	186	321.772	'DSC_3141.jpg'	0	900	1200	0.375003	0.334351	0.290646	0.658053	93.3533	74.3104	28.9936	900x1200 single	0.0937963	0.142536	601x1 single	15.9016	15.0339
main dish	poulet + ratatouille	chicken + ratatouille	310	423.667	'DSC_3142.jpg'	0	900	1200	0.408701	0.318458	0.272841	0.707407	105.837	95.8435	48.396	900x1200 single	0.126861	0.179332	601x1 single	16.8353	16.0473
main dish	poisson + ratatouille	fish + ratatouille	310	162.779	'DSC_3144.jpg'	0	900	1200	0.391007	0.317664	0.291329	0.715207	99.2571	87.0154	51.3361	900x1200 single	0.115819	0.161938	601x1 single	16.562	15.7743
starter	salade saumon fumé tomate endive emmental	salad smoked salmon tomato endive emmental	128	30.148	'DSC_3146.jpg'	0	900	1200	0.392944	0.338404	0.268652	0.25228	119.154	87.0066	31.6725	900x1200 single	0.0551296	0.218526	601x1 single	15.7124	15.0127
dessert	creme chocolat vanille	vanilla chocolate cream	193	264.41	'DSC_3147.jpg'	0	900	1200	0.366986	0.330318	0.302696	0.197503	126.29	111.215	44.3669	900x1200 single	0.0483889	0.245004	601x1 single	15.787	15.0242
starter	pâté	pâté	54	179.82	'DSC_3148.jpg'	0	900	1200	0.353432	0.342212	0.304356	0.413382	110.291	82.3234	41.1822	900x1200 single	0.0757546	0.183256	601x1 single	16.5358	15.8559
starter	taboulet	taboulet	97	144.53	'DSC_3150.jpg'	0	900	1200	0.407146	0.334892	0.257962	0.2114	122.798	95.9336	34.3462	900x1200 single	0.0852824	0.403417	601x1 single	16.7513	16.0461
main dish	saucisse + carottes	sausage + carrots		441.392	'DSC_3151.jpg'	0	900	1200	0.41751	0.310435	0.272055	0.614925	110.809	98.7911	52.1327	900x1200 single	0.0733519	0.119286	601x1 single	16.6146	15.9269
main dish	saucisse + purée	sausage + mashed potatoes		288.604	'DSC_3152.jpg'	0	900	1200	0.367732	0.32737	0.304899	0.619296	98.5706	79.2499	42.8543	900x1200 single	0.0544583	0.0879358	601x1 single	15.8948	15.1285
main dish	bœuf + carottes	beef + carrots		215.594	'DSC_3153.jpg'	0	900	1200	0.422431	0.315015	0.262554	0.617672	116.886	108.768	60.0721	900x1200 single	0.0849537	0.137538	601x1 single	16.7139	15.988
main dish	bœuf + purée	beef + mashed potatoes		368.382	'DSC_3154.jpg'	0	900	1200	0.384109	0.327141	0.28875	0.642766	109.453	98.0342	57.9076	900x1200 single	0.0652269	0.101478	601x1 single	16.3228	15.5374
dessert	poire	pear	142	75.26	'DSC_3156.jpg'	0	900	1200	0.368597	0.342138	0.289265	0.213156	121.963	92.2961	31.1512	900x1200 single	0.0251898	0.118175	601x1 single	15.5681	14.9023
starter	cervelas	cervelas	48	140.16	'DSC_3158.jpg'	0	900	1200	0.359196	0.345812	0.294991	0.393499	112.836	86.3822	29.0325	900x1200 single	0.0776667	0.197374	601x1 single	15.4741	14.8224
main dish	saucisse + purée	sausage + mashed potatoes	304	429.799	'DSC_3159.jpg'	0	900	1200	0.349963	0.337138	0.312899	0.644886	93.6656	73.6576	28.8694	900x1200 single	0.088338	0.136982	601x1 single	15.5698	14.7619
main dish	poisson + potiron broccoli	fish + pumpkin broccoli	353	147.935	'DSC_3160.jpg'	0	900	1200	0.393969	0.336899	0.269131	0.658829	103.448	89.6982	46.5632	900x1200 single	0.134769	0.204558	601x1 single	16.655	15.8764
dessert	île flottante	floating island	99	136.62	'DSC_3163.jpg'	0	900	1200	0.380089	0.339412	0.280499	0.266871	114.14	70.5703	31.8538	900x1200 single	0.0410926	0.153979	601x1 single	14.4396	13.803
dessert	orange	orange	174	80.91	'DSC_3208.jpg'	0	900	1200	0.448563	0.343068	0.20837	0.221617	124.929	107.118	27.5963	900x1200 single	0.0272176	0.122814	601x1 single	14.1025	13.4144
dessert	clafouti prune	plum clafouti	147	311.64	'DSC_3209.jpg'	0	900	1200	0.43221	0.336844	0.230946	0.225257	127.037	116.845	39.9048	900x1200 single	0.077125	0.342386	601x1 single	15.7538	14.9267
main dish	poulet + blettes	chicken + chard	207	139.026	'DSC_3210.jpg'	0	900	1200	0.364868	0.334314	0.300818	0.645479	115.342	107.292	65.2574	900x1200 single	0.135505	0.209929	601x1 single	17.2787	16.4979
starter	salade pommes de terre poivron	pepper potatoes salad	95	52.0125	'DSC_3211.jpg'	0	900	1200	0.373731	0.360088	0.266181	0.240336	125.469	111.149	46.2986	900x1200 single	0.0611481	0.254428	601x1 single	16.245	15.4341
dessert	verrine crème	cream verrine	152	206.72	'DSC_3218.jpg'	0	900	1200	0.370917	0.334341	0.294742	0.171467	122.673	87.2683	26.545	900x1200 single	0.0446991	0.260687	601x1 single	15.2959	14.5162
starter	tomates sardines	sardine tomatoes	103	64.108	'DSC_3219.jpg'	0	900	1200	0.419591	0.331473	0.248936	0.21448	127.723	119.382	42.8883	900x1200 single	0.0545	0.254103	601x1 single	16.5736	15.9182
dessert	raisin	grape	106	65.826	'DSC_3221.jpg'	0	900	1200	0.32843	0.316781	0.354789	0.218881	134.465	150.401	65.7412	900x1200 single	0.040713	0.186005	601x1 single	16.4133	15.4815
main dish	foie de veau + blé	veal liver + wheat	221	326.56	'DSC_3222.jpg'	0	900	1200	0.377629	0.330195	0.292176	0.643143	107.928	95.6805	52.0013	900x1200 single	0.122412	0.190334	601x1 single	17.0284	16.2244
dessert	crêpe chocolat	chocolate crepe	106	453.56	'DSC_3223.jpg'	0	900	1200	0.389413	0.33493	0.275656	0.407374	111.02	83.4085	43.0876	900x1200 single	0.0926944	0.227541	601x1 single	16.1596	15.3994
dessert	crêpe	crepe	51	163.71	'DSC_3226.jpg'	0	900	1200	0.379428	0.336834	0.283738	0.399623	102.952	62.3174	18.0724	900x1200 single	0.102	0.25524	601x1 single	15.5808	14.8625
dessert	compote fruits rouges	red fruit compote	177	184.08	'DSC_3228.jpg'	0	900	1200	0.416826	0.28616	0.297013	0.204532	134.853	153.729	40.0537	900x1200 single	0.0338935	0.165712	601x1 single	15.3463	14.5556
starter	pommes de terre poivrons	potatoes peppers	136	74.46	'DSC_3229.jpg'	0	900	1200	0.448176	0.285249	0.266575	0.235671	128.445	123.403	52.2707	900x1200 single	0.0581898	0.246911	601x1 single	16.6774	15.8329
dessert	raisin	grape	132	81.972	'DSC_3230.jpg'	0	900	1200	0.344653	0.31465	0.340696	0.22761	134.158	148.269	61.5543	900x1200 single	0.0563426	0.24754	601x1 single	16.2079	15.4562
main dish	jambon + semoule	ham + semolina	207	387.65	'DSC_3231.jpg'	0	900	1200	0.399601	0.327378	0.273022	0.657819	105.436	92.6586	47.3138	900x1200 single	0.148931	0.226401	601x1 single	17.2856	16.5308
starter	quiche	quiche	143	417.56	'DSC_3232.jpg'	0	900	1200	0.39566	0.337129	0.267211	0.279544	113.853	72.2369	27.982	900x1200 single	0.070713	0.252959	601x1 single	15.971	15.2854
main dish	poulet + pâtes	chicken + pasta	402	567.825	'DSC_3233.jpg'	0	900	1200	0.405094	0.349404	0.245503	0.613174	97.1424	76.4139	32.2517	900x1200 single	0.129782	0.211657	601x1 single	16.6907	15.9114
dessert	gateau roulé	rolled cake	53	207.23	'DSC_3234.jpg'	0	900	1200	0.360039	0.329036	0.310925	0.222127	121.381	91.1956	42.2728	900x1200 single	0.0491435	0.221241	601x1 single	16.7276	16.045
main dish	poisson + fenouil	fish + fennel	200	86.522	'DSC_3236.jpg'	0	900	1200	0.359714	0.338613	0.301673	0.658878	93.36	74.3902	27.6099	900x1200 single	0.101569	0.154155	601x1 single	16.0998	15.326
starter	haricots	beans	95	31.635	'DSC_3237.jpg'	0	900	1200	0.42018	0.335817	0.244003	0.223615	128.183	121.876	45.8889	900x1200 single	0.0779815	0.348731	601x1 single	16.7112	15.9281
dessert	creme	cream	201	275.37	'DSC_3239.jpg'	0	900	1200	0.353705	0.333779	0.312516	0.205475	121.881	90.485	43.45	900x1200 single	0.0281574	0.137036	601x1 single	15.3279	14.2242
main dish	aiguillettes de poulet + poireaux	chicken aiguillettes + leek	266	246.912	'DSC_3320.jpg'	0	900	1200	0.342312	0.335458	0.32223	0.619471	93.5239	71.1173	32.8338	900x1200 single	0.104139	0.168109	601x1 single	16.452	15.6436
starter	lentilles cervelas	cervela lentils	108	200.016	'DSC_3322.jpg'	0	900	1200	0.387299	0.34106	0.271641	0.241993	128.98	125.785	51.9497	900x1200 single	0.0770741	0.318498	601x1 single	16.4534	15.6703
dessert	verrine crème fruits rouges	verrine creme red fruits	235	184.099	'DSC_3324.jpg'	0	900	1200	0.416477	0.273736	0.309787	0.202294	138.906	174.026	55.9683	900x1200 single	0.0613935	0.303486	601x1 single	16.5236	15.8326
main dish	aiguillettes de poulet + pâtes	chicken aiguillettes + pasta	385	534.25	'DSC_3326.jpg'	0	900	1200	0.356911	0.341038	0.302052	0.641643	89.9444	67.5733	24.2453	900x1200 single	0.13994	0.218096	601x1 single	16.2378	15.3934
main dish	quenelles + haricots	quenelles + beans	285	341.798	'DSC_3328.jpg'	0	900	1200	0.420841	0.322327	0.256832	0.642002	116.557	109.061	59.3121	900x1200 single	0.138894	0.216344	601x1 single	16.9076	16.1353
starter	chou carottes	cabbage carrots	110	168.3	'DSC_3329.jpg'	0	900	1200	0.38504	0.350138	0.264821	0.236608	120.412	89.4753	33.412	900x1200 single	0.0729676	0.30839	601x1 single	15.7651	15.0626
dessert	tiramisu	Tiramisu	102	285.6	'DSC_3330.jpg'	0	900	1200	0.42322	0.309434	0.267346	0.242953	134.227	147.397	48.7469	900x1200 single	0.050625	0.208374	601x1 single	16.8185	16.1318
dessert	compote	compote	164	153.668	'DSC_3331.jpg'	0	900	1200	0.402942	0.329797	0.267262	0.248089	125.664	112.522	35.5874	900x1200 single	0.0335602	0.135275	601x1 single	15.275	14.5058
main dish	veau + fenouil	veal + fennel	333	186.935	'DSC_3332.jpg'	0	900	1200	0.372242	0.33038	0.297378	0.619229	101.309	83.6661	37.5677	900x1200 single	0.109806	0.177326	601x1 single	16.4505	15.6579
dessert	mousse coco	coconut mousse	72	107.28	'DSC_3333.jpg'	0	900	1200	0.33491	0.329119	0.335971	0.186464	122.543	90.0069	42.5165	900x1200 single	0.0311296	0.166947	601x1 single	15.9381	15.0917
starter	betteraves cœurs de palmier	beetroot palm hearts	96	38.401	'DSC_3334.jpg'	0	900	1200	0.381953	0.317477	0.30057	0.217696	129.366	127.087	67.7845	900x1200 single	0.0484028	0.222341	601x1 single	16.3241	15.5668
main dish	omelette + haricots	omelette + beans	232	252.972	'DSC_3336.jpg'	0	900	1200	0.371544	0.349012	0.279444	0.73595	110.764	103.863	57.5445	900x1200 single	0.156338	0.21243	601x1 single	17.0514	16.2522
main dish	omelette + pommes de terre	omelette + potatoes	232	415.04	'DSC_3339.jpg'	0	900	1200	0.397197	0.328484	0.274319	0.670221	110.509	100.919	54.2984	900x1200 single	0.129431	0.193116	601x1 single	17.0999	16.3506
dessert	éclair au chocolat	chocolate eclair	85	256.7	'DSC_3340.jpg'	0	900	1200	0.385348	0.324622	0.29003	0.27405	119.937	93.2801	57.074	900x1200 single	0.0351944	0.128423	601x1 single	16.0972	15.413
starter	salade d'endives	chicory salad	90	15.75	'DSC_3342.jpg'	0	900	1200	0.36648	0.341726	0.291793	0.20853	118.787	76.2303	31.0651	900x1200 single	0.0385741	0.184981	601x1 single	15.3749	14.5962
main dish	bavette + frites	flank steak + French fries	255	594.36	'DSC_3345.jpg'	0	900	1200	0.396431	0.331625	0.271944	0.638977	109.086	97.2698	54.7489	900x1200 single	0.136588	0.21376	601x1 single	16.9539	16.2075
starter	carottes rapées pignons	grated carrots pine nuts	69	47.7721	'DSC_3346.jpg'	0	900	1200	0.493865	0.317836	0.188299	0.224744	125.195	108.621	29.1283	900x1200 single	0.0864028	0.384449	601x1 single	15.9806	15.2343
dessert	crème caramel	caramel cream	126	171.36	'DSC_3347.jpg'	0	900	1200	0.393337	0.334482	0.272181	0.179102	127.854	118.019	22.9551	900x1200 single	0.0340139	0.189914	601x1 single	15.4147	14.8093
main dish	choucroute garnie	sauerkraut	356	491.11	'DSC_3348.jpg'	0	900	1200	0.392453	0.322045	0.285502	0.711828	97.3668	84.1557	53.6585	900x1200 single	0.115519	0.162284	601x1 single	16.5723	15.7142
cheese	fromage	cheese	35	104.65	'DSC_3349.jpg'	0	900	1200	0.34621	0.356024	0.297766	0.23186	116.619	72.2883	25.8225	900x1200 single	0.0347685	0.149955	601x1 single	14.7301	14.0996
dessert	yaourt	yoghurt	125	81.25	'DSC_3350.jpg'	0	900	1200	0.30336	0.3444	0.35224	0.110677	122.465	61.9233	30.6399	900x1200 single	0.0256296	0.231572	601x1 single	16.3444	15.7204
dessert	galette des rois	Epiphany cake	111	506.16	'DSC_3351.jpg'	0	900	1200	0.393598	0.339695	0.266708	0.273242	113.343	69.0405	17.0196	900x1200 single	0.0626574	0.229311	601x1 single	15.2833	14.5255
starter	rosette	Rosette	34	136.68	'DSC_3353.jpg'	0	900	1200	0.404224	0.313746	0.28203	0.4438	119.112	105.466	43.8732	900x1200 single	0.129218	0.291162	601x1 single	16.5966	15.8571
main dish	curry de veau + pommes de terre et poireaux	veal curry + potatoes and leeks	358	316.886	'DSC_3354.jpg'	0	900	1200	0.389019	0.333317	0.277664	0.702141	104.431	93.5845	50.3625	900x1200 single	0.111542	0.158859	601x1 single	16.8142	16.0869
starter	salade de poulet	chicken salad	87	50.6688	'DSC_3355.jpg'	0	900	1200	0.384909	0.339335	0.275756	0.223728	122.629	97.0544	37.1237	900x1200 single	0.0678287	0.303175	601x1 single	16.5174	15.7452
dessert	crème au chocolat	chocolate cream	172	282.08	'DSC_3358.jpg'	0	900	1200	0.36772	0.319686	0.312594	0.236536	133.445	144.566	45.7309	900x1200 single	0.0466944	0.197409	601x1 single	16.1791	15.3797
dessert	Gateau basque	Basque cake	116	406	'DSC_3360.jpg'	0	900	1200	0.410862	0.326941	0.262197	0.275962	119.62	92.3865	43.5863	900x1200 single	0.0602176	0.21821	601x1 single	16.1904	15.5442
cheese	tomme	tomme	53	181.79	'DSC_3361.jpg'	0	900	1200	0.34392	0.334746	0.321334	0.222021	114.113	58.4453	24.0432	900x1200 single	0.0207963	0.093668	601x1 single	13.6627	12.8235
starter	salade tomate-surimi	tomato-surimi salad	77	19.1422	'DSC_3362.jpg'	0	900	1200	0.389581	0.361994	0.248425	0.233131	122.978	99.8782	34.3975	900x1200 single	0.0695648	0.298393	601x1 single	16.1246	15.3607
main dish	nems + broccoli	nems + broccoli		298.728	'DSC_3366.jpg'	0	900	1200	0.386106	0.339525	0.274369	0.644332	120.227	114.832	60.3739	900x1200 single	0.142787	0.221605	601x1 single	17.404	16.7332
main dish	nems + riz	nems + rice		424.8	'DSC_3367.jpg'	0	900	1200	0.36114	0.331244	0.307616	0.692391	93.6022	77.4317	34.6677	900x1200 single	0.155435	0.224491	601x1 single	16.4606	15.6631
main dish	porc + broccoli	pork + broccoli		411.168	'DSC_3368.jpg'	0	900	1200	0.375296	0.337868	0.286836	0.65685	120.494	115.528	59.2496	900x1200 single	0.165347	0.251728	601x1 single	17.3911	16.7056
main dish	porc + riz	pork + rice		537.24	'DSC_3369.jpg'	0	900	1200	0.355876	0.328059	0.316065	0.687925	97.7073	83.0578	38.3217	900x1200 single	0.153032	0.222455	601x1 single	16.5177	15.6989
main dish	poisson + chou	fish + cabbage	234	113.562	'DSC_3378.jpg'	0	900	1200	0.363488	0.338425	0.298088	0.671901	95.5719	78.7602	34.6814	900x1200 single	0.131227	0.195307	601x1 single	16.3935	15.6156
main dish	porc + pâtes	pork + pasta	259	515.53	'DSC_3379.jpg'	0	900	1200	0.381397	0.342322	0.27628	0.662945	96.7184	79.7974	38.1604	900x1200 single	0.120134	0.181213	601x1 single	16.5253	15.7379
dessert	tarte clafouti	clafouti pie	145	403.1	'DSC_3381.jpg'	0	900	1200	0.401167	0.330622	0.268211	0.275461	114.573	73.995	39.1721	900x1200 single	0.0562407	0.204169	601x1 single	16.1716	15.4317
starter	celeri remoulade	celery remoulade	80	113.6	'DSC_3382.jpg'	0	900	1200	0.341657	0.336863	0.321481	0.218025	114.488	58.8526	28.8394	900x1200 single	0.046088	0.211388	601x1 single	15.3023	14.5064
dessert	fromage blanc coulis de fraise	white cheese strawberry coulis	207	160.642	'DSC_3383.jpg'	0	900	1200	0.448878	0.256341	0.294781	0.258703	137.217	157.897	60.0447	900x1200 single	0.0431852	0.16693	601x1 single	16.2944	15.332
main dish	saussices + broccoli chou carottes	sausages + broccoli cabbage carrots		358.451	'DSC_3385.jpg'	0	900	1200	0.38487	0.326641	0.288489	0.634162	111.029	100.085	61.2281	900x1200 single	0.095875	0.151184	601x1 single	16.9586	16.1357
starter	chou rouge lardons	red cabbage bacon	107	83.2888	'DSC_3387.jpg'	0	900	1200	0.429462	0.262717	0.307821	0.20921	126.735	114.394	55.9636	900x1200 single	0.0774907	0.370397	601x1 single	17.0342	16.2835
main dish	mijoté de dinde + légumes	stewed turkey + vegetables	278	223.304	'DSC_3389.jpg'	0	900	1200	0.391469	0.333789	0.274741	0.609036	109.705	96.676	45.2154	900x1200 single	0.111458	0.183008	601x1 single	16.888	16.2116
